# Supplementary material
Source: HighWire-hosted journal article supplement (https://erj.ersjournals.com/content/58/5/2004090)
Supplement: inline-supplementary-material-6 [file inline-supplementary-material-6.pdf]

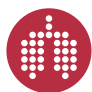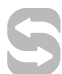

SHAREABLE PDF

# A virtual crossmatch-based strategy for perioperative desensitisation in lung transplant recipients with pre-formed donor-specific antibodies: 3-year outcome

Francois Parquin<sup>1</sup>, Benjamin Zuber<sup>1</sup>, Alexandre Vallée<sup>2</sup>, Jean-Luc Taupin<sup>3</sup>, Elise Cuquemelle<sup>1</sup>, Stéphanie Malard<sup>3</sup>, Mathilde Neuville<sup>1</sup>, Jérôme Devaquet<sup>1</sup>, Morgan Le Guen<sup>4</sup>, Julien Fessler<sup>4</sup>, Laurence Beaumont<sup>5</sup>, Clément Picard<sup>5</sup>, Abdulmonem Hamid<sup>5</sup>, Sylvie Colin de Verdière<sup>5</sup>, Dominique Grenet<sup>5</sup>, Sandra De Miranda<sup>5</sup>, Matthieu Glorion<sup>6</sup>, Edouard Sage<sup>6</sup>, Ciprian Pricopi<sup>6</sup>, Julien De Wolf<sup>6</sup>, Anne-Laure Brun<sup>7</sup>, Elisabeth Longchamp<sup>8</sup>, Charles Cerf<sup>1</sup>, Antoine Roux<sup>5</sup> and Olivier Brugière<sup>5</sup>

<sup>1</sup>Service de Réanimation Médicale, Foch Hospital, Suresnes, France. <sup>2</sup>Dept of Clinical Research and Innovation, Foch Hospital, Suresnes, France. <sup>3</sup>Laboratoire d'Immunologie et Histocompatibilité, Hôpital Saint-Louis, Paris, France. <sup>4</sup>Service d'Anesthésie-Réanimation, Foch Hospital, Suresnes, France. <sup>5</sup>Service de Transplantation Pulmonaire et Centre de Compétence de la Mucoviscidose, Foch Hospital, Suresnes, France. <sup>6</sup>Service de Chirurgie Thoracique, Foch Hospital, Suresnes, France. <sup>7</sup>Service de Radiologie, Foch Hospital, Suresnes, France. <sup>8</sup>Service d'Anatomopathologie, Foch Hospital, Suresnes, France.

Corresponding author: Olivier Brugière (o.brugiere@hopital-foch.com)

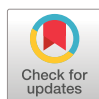

Shareable abstract (@ERSpublications)

**A perioperative desensitisation protocol in lung transplant recipients with high pre-formed DSAs was associated with satisfactory outcome. Cleared pre-formed DSAs after desensitisation was identified as an independent predictor of graft survival.** <https://bit.ly/3mN6OkY>

**Cite this article as:** Parquin F, Zuber B, Vallée A, et al. A virtual crossmatch-based strategy for perioperative desensitisation in lung transplant recipients with pre-formed donor-specific antibodies: 3-year outcome. *Eur Respir J* 2021; 58: 2004090 [DOI: 10.1183/13993003.04090-2020].

This single-page version can be shared freely online.

Copyright ©The authors 2021. For reproduction rights and permissions contact [permissions@ersnet.org](mailto:permissions@ersnet.org)

This article has supplementary material available from [erj.ersjournals.com](http://erj.ersjournals.com)

Received: 17 Nov 2020  
Accepted: 8 April 2021

## Abstract

**Background** Pre-formed donor-specific antibodies (DSAs) are associated with worse outcome after lung transplantation (LTx) and might limit access to LTx. A virtual crossmatch-based strategy for perioperative desensitisation protocol has been used for immunised LTx candidates since 2012 at Foch Hospital (Suresnes, France). We compared the outcome of desensitised LTx candidates with high DSA mean fluorescence intensity and those with low or no pre-formed DSAs, not desensitised.

**Methods** For all consecutive LTx recipients (January 2012 to March 2018), freedom from chronic lung allograft dysfunction (CLAD) and graft survival were assessed using Kaplan–Meier analysis and Cox multivariate analysis.

**Results** We compared outcomes for desensitised patients with high pre-formed DSAs (n=39) and those with no (n=216) or low pre-formed DSAs (n=66). The desensitisation protocol decreased the level of immunodominant DSA (class I/II) at 1, 3 and 6 months post-LTx ( $p<0.001$ ,  $p<0.01$  and  $p<0.001$ , respectively). Freedom from CLAD and graft survival at 3 years was similar in the desensitised group as a whole and other groups. Nevertheless, incidence of CLAD was higher with persistent high-level DSAs than cleared high-level ( $p=0.044$ ) or no DSAs ( $p=0.014$ ). Conversely, graft survival was better with cleared high DSAs than persistent high-level, low-level and no pre-formed DSAs ( $p=0.019$ ,  $p=0.025$  and  $p=0.044$ , respectively). On multivariate analysis, graft survival was associated with cleared high DSAs (hazard ratio 0.12, 95% CI 0.02–0.85 versus no DSAs;  $p=0.035$ ) and CLAD with persistent DSAs (3.04, 1.02–9.17 versus no pre-formed DSAs;  $p=0.048$ ).

**Conclusion** The desensitisation protocol in LTx recipients with high pre-formed DSAs was associated with satisfactory outcome, with cleared high pre-formed DSAs after desensitisation identified as an independent predictor of graft survival.
